# Supplementary material
Source: publisher site journal article supplement (https://www.dovepress.com/article/438818)
Supplement: Supplementary file 1 [file get_supplementary_file.php]

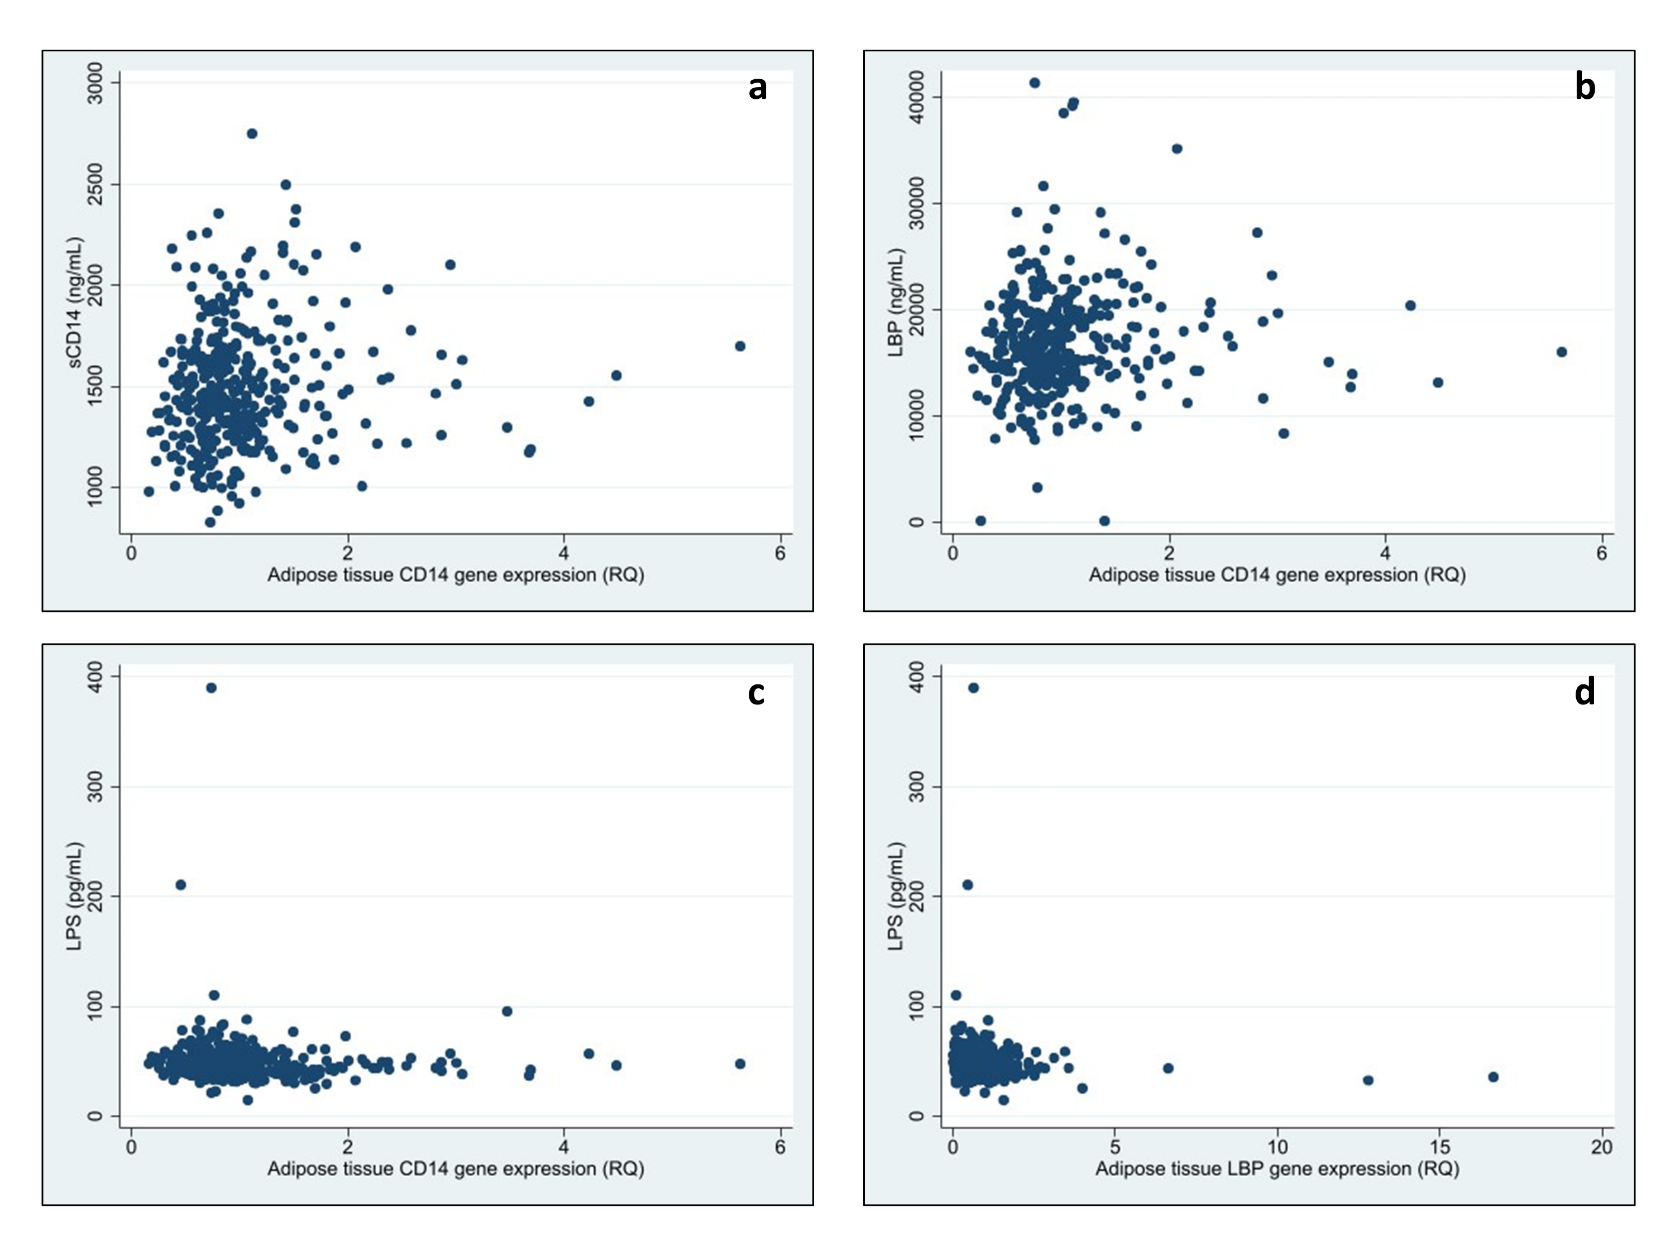
Supplementary figure 1 a-d

**Supplementary figure 1 a-d** Correlation between circulating gut leakage markers and corresponding gene expression in SAT.
Abbreviations: CD14=cluster of differentiation 14. sCD14= soluble CD14. LBP=LPS-binding protein. RQ=relative quantification.

# Supplementary figure 2 a-g


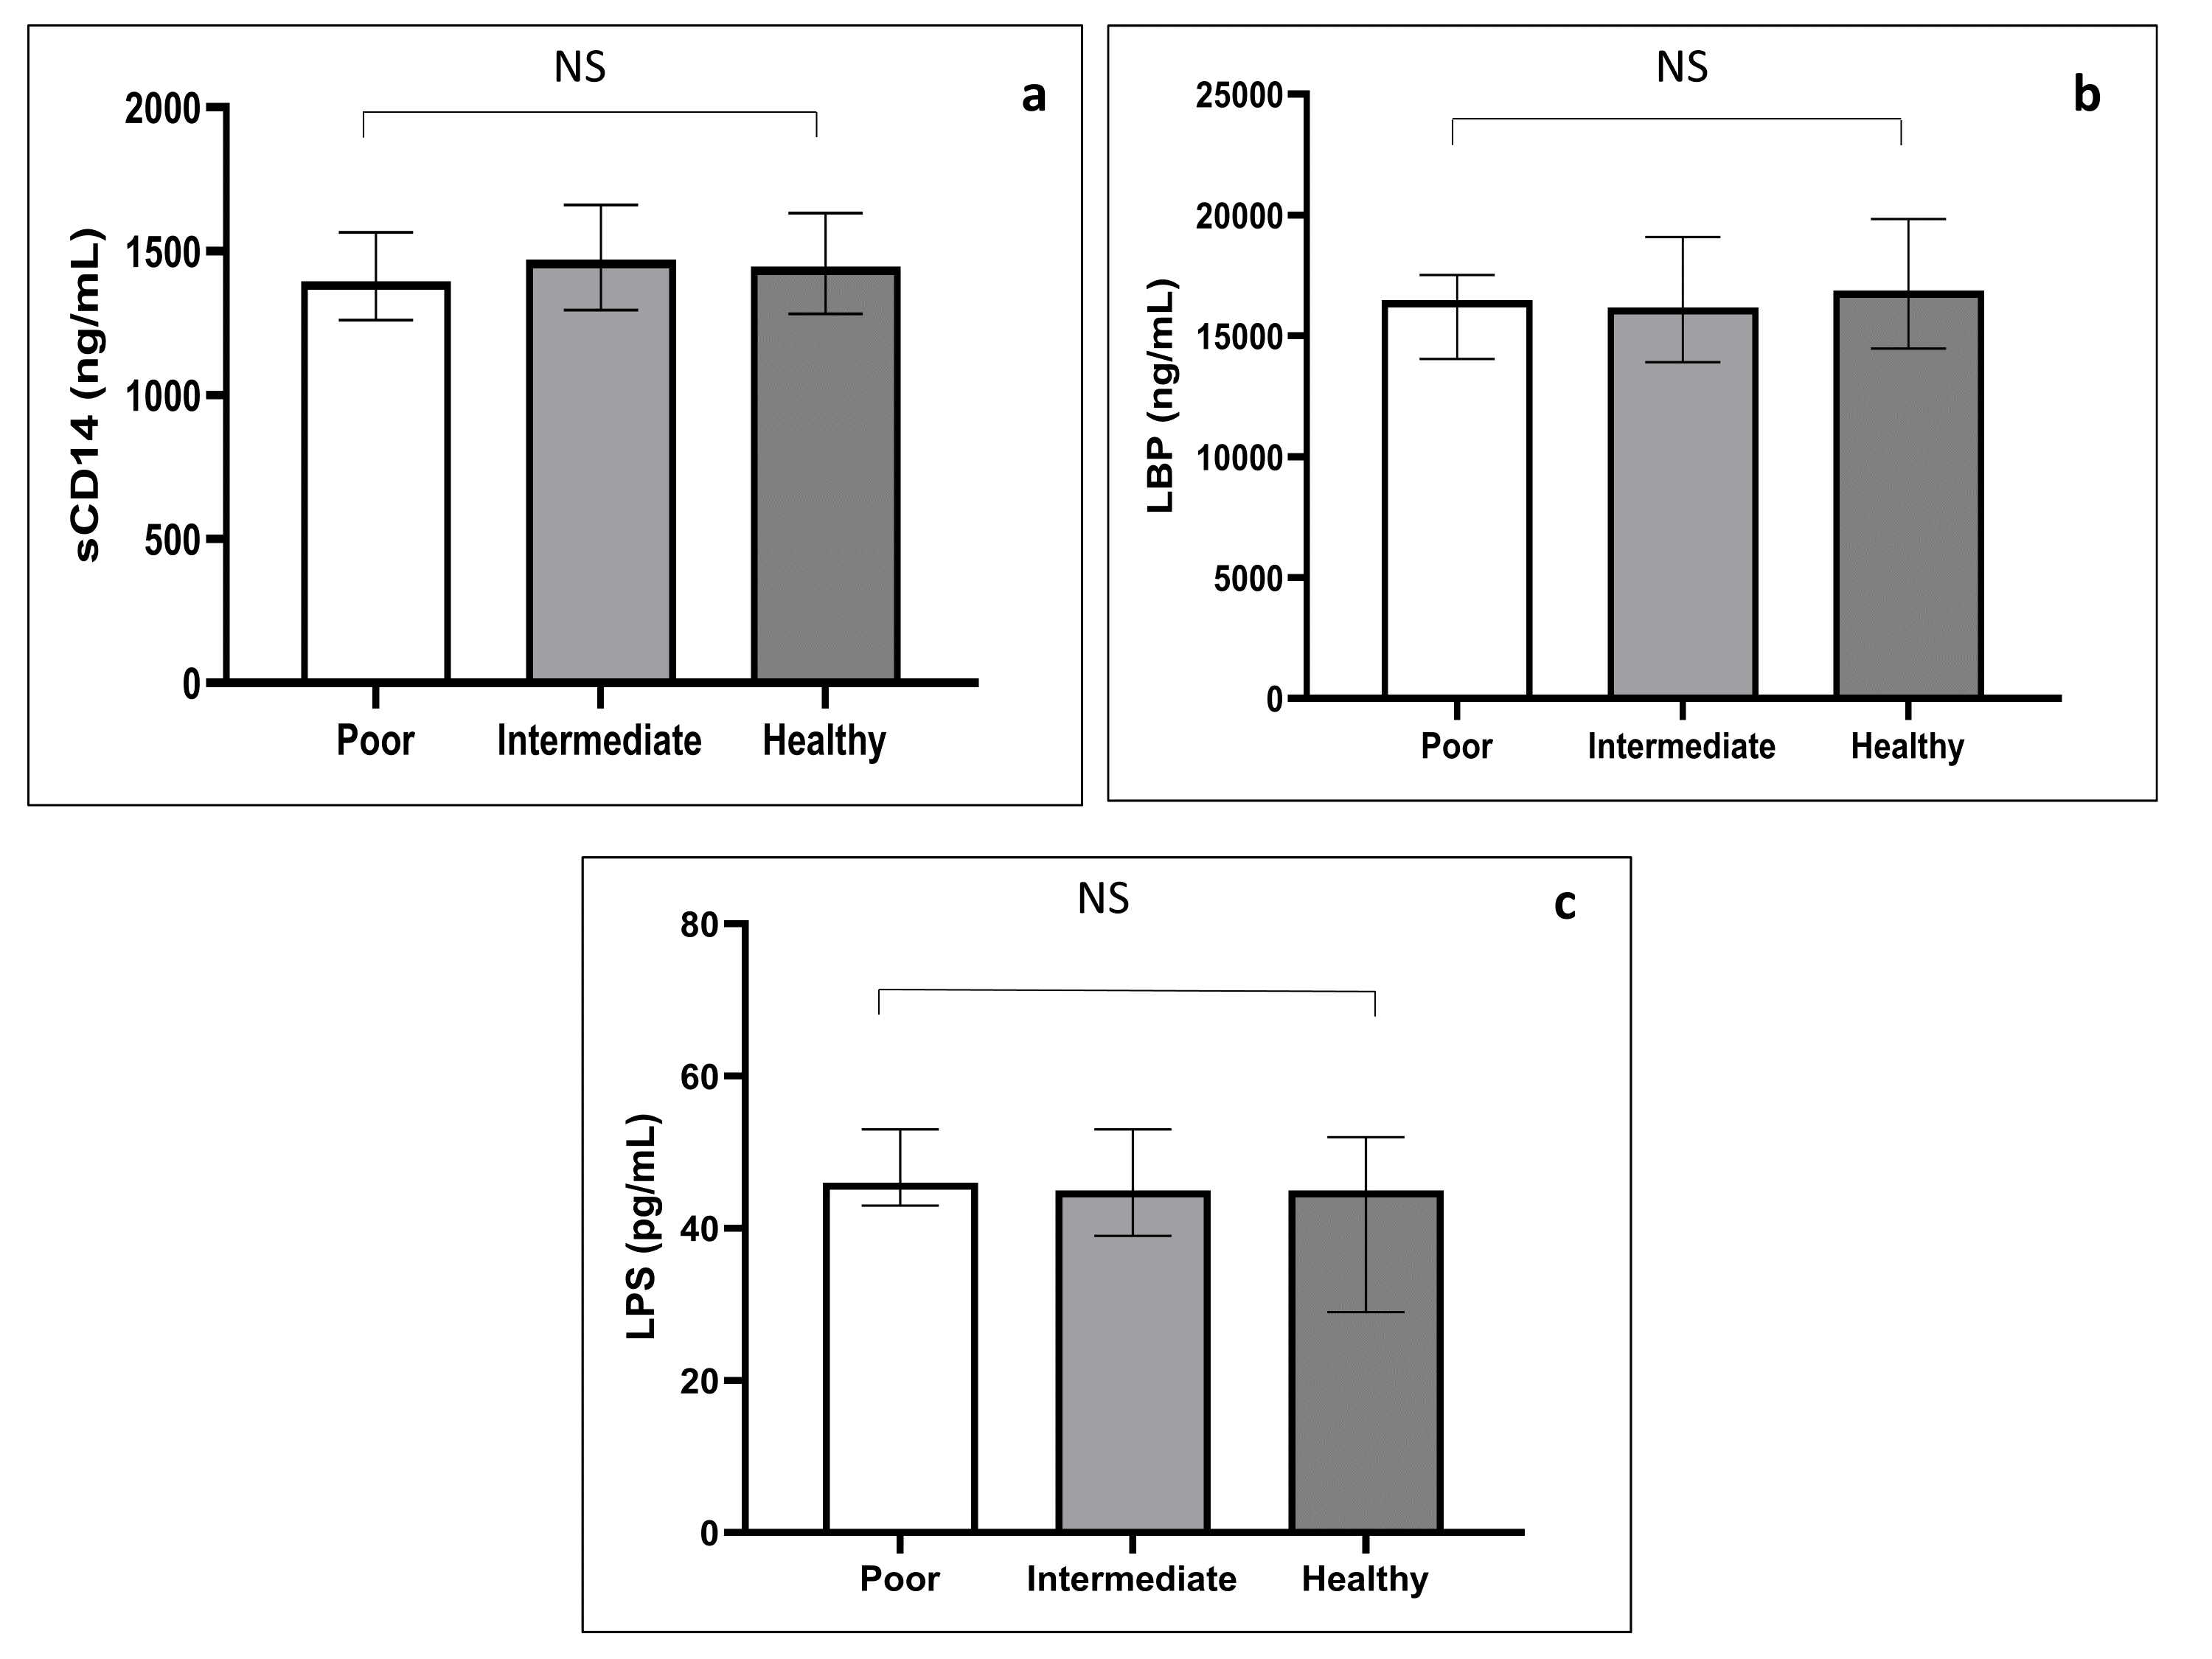


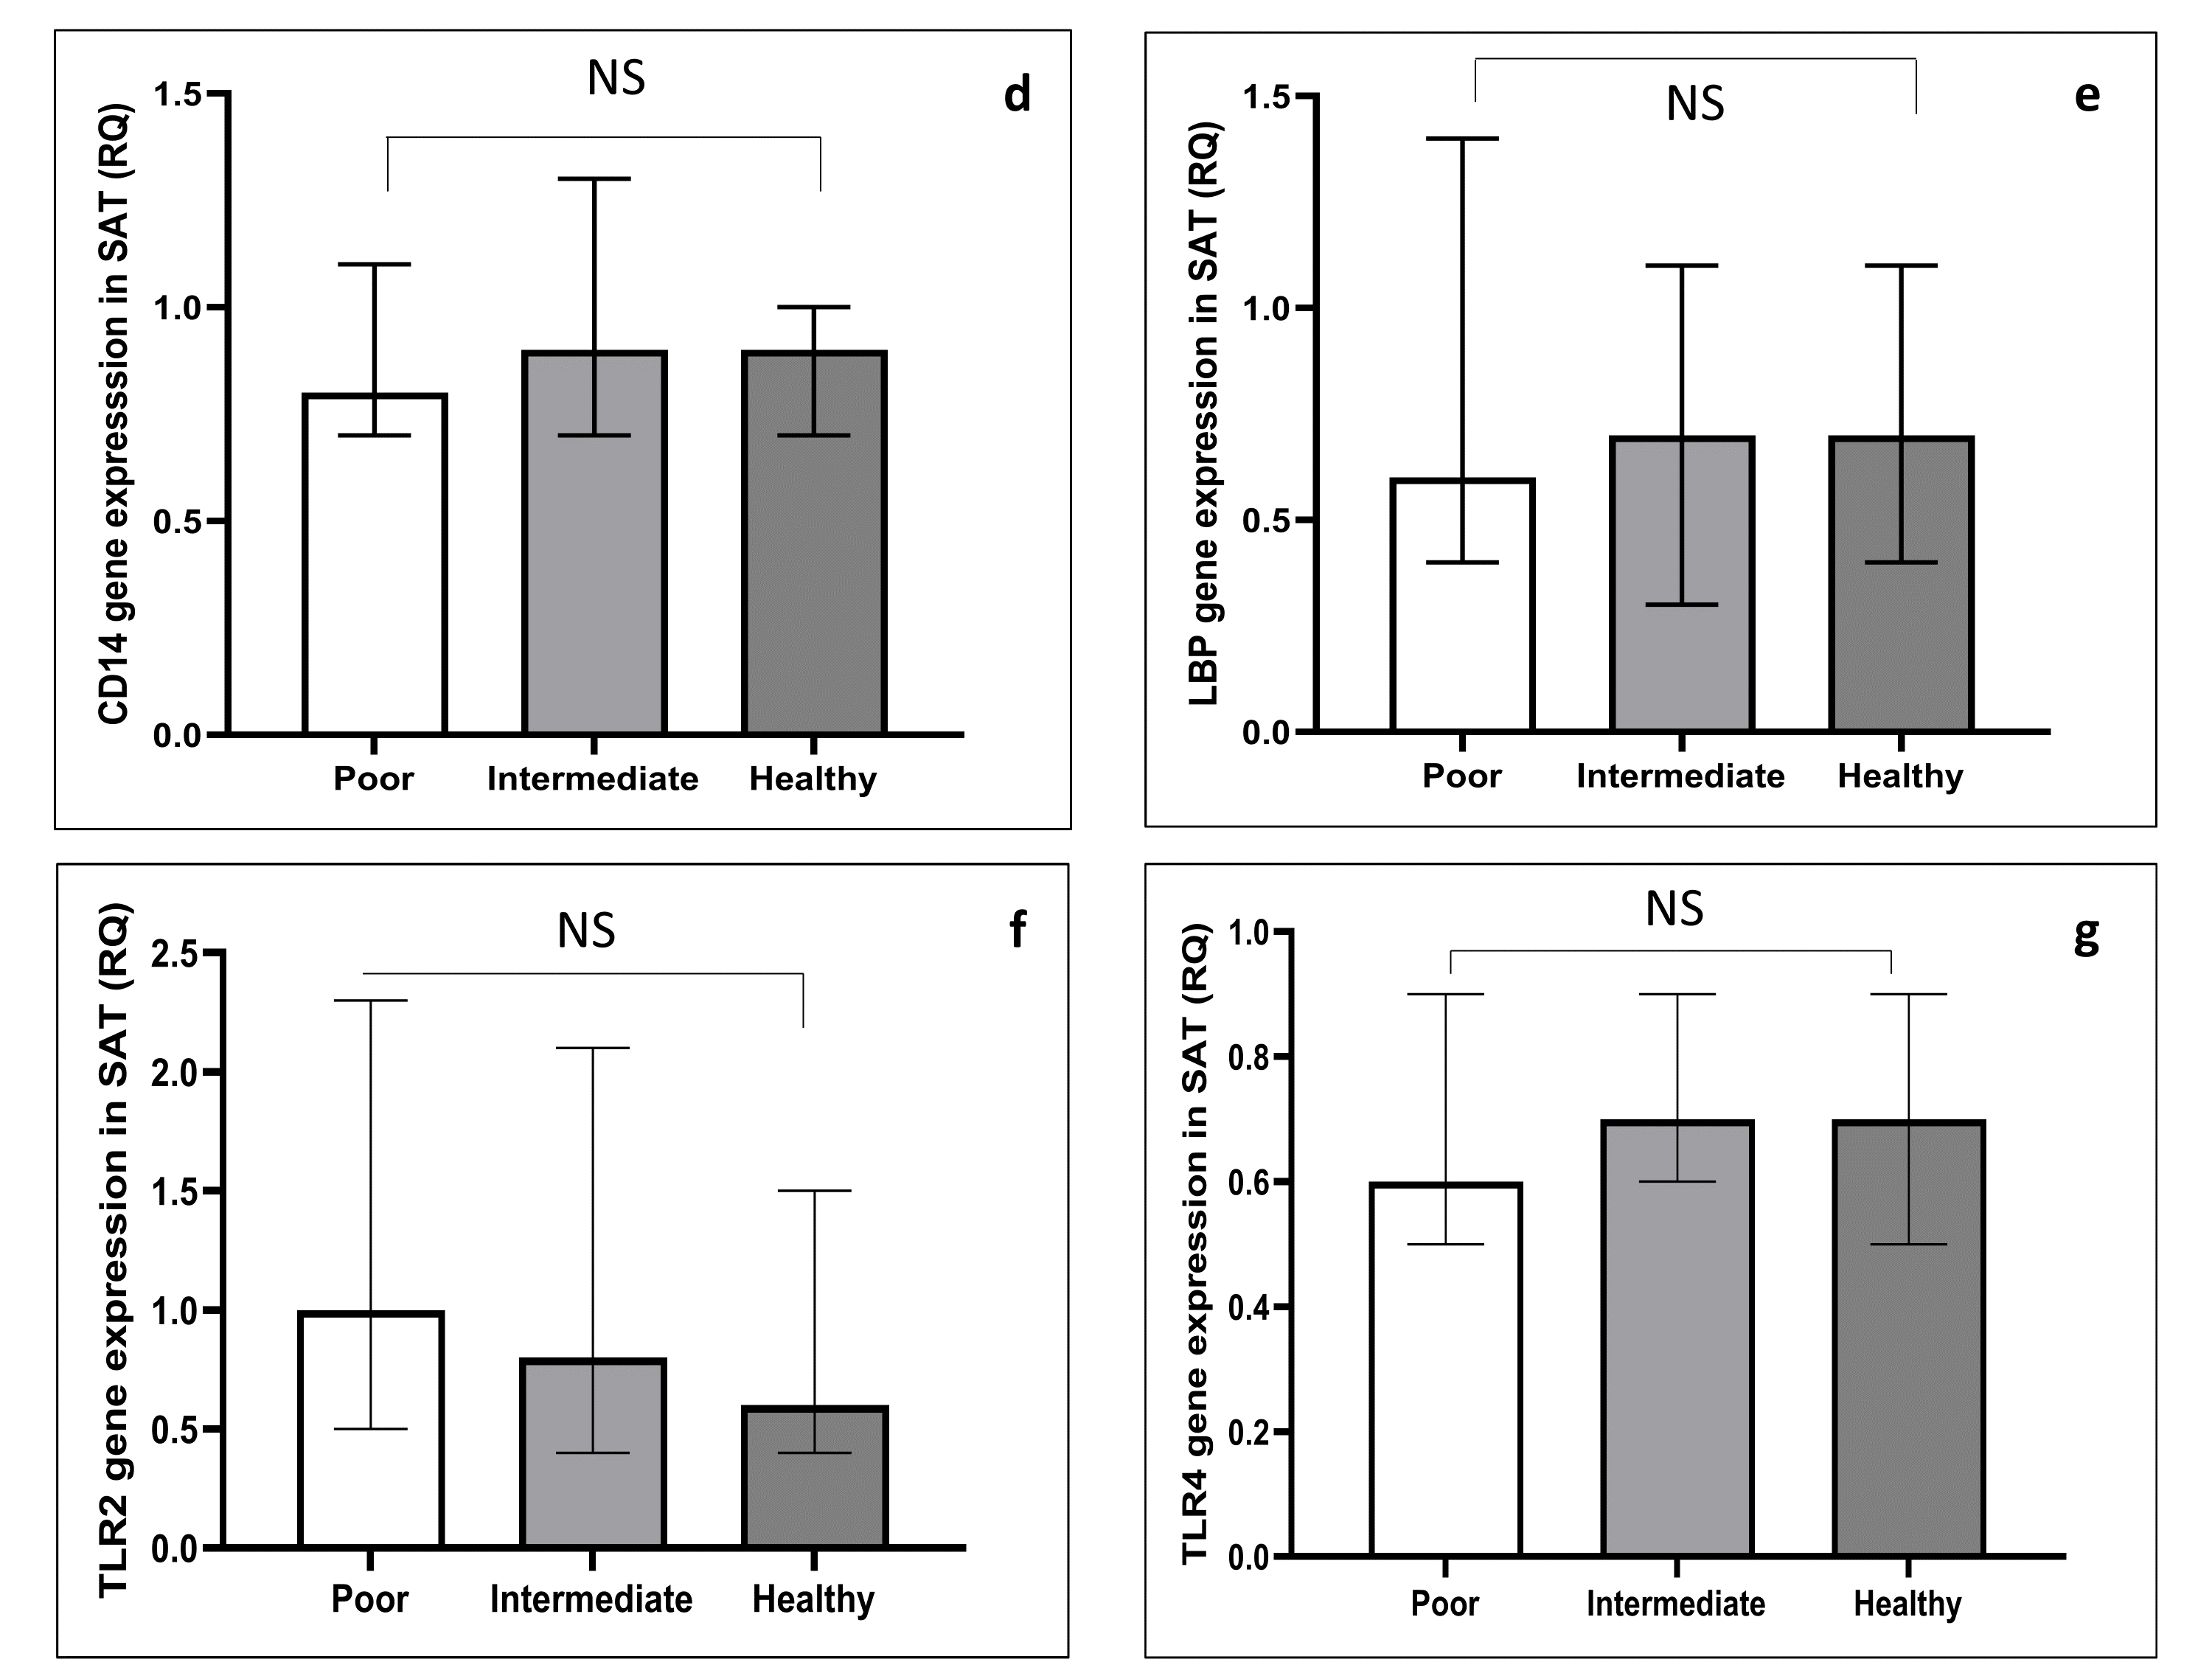


**Supplementary figure 2 a-g** Circulating levels and genetic expression in SAT of gut leakage markers in relation to diet.
Abbreviations: CD14=cluster of differentiation 14. sCD14= soluble CD14. LPS=Lipopolysaccharide. LBP=LPS-binding protein. TLR2/4=Toll-like receptor 2/4. RQ=relative quantification. SAT=subcutaneous adipose tissue. NS=Not significant. Diet is defined as “poor”, “intermediate” or “healthy”.
